# Supplementary material for: CatalyticSNAr reaction of non-activated fluoroarenes with amines viaRuη6-arene complexes
Source: Royal Society of Chemistry journal article supplement (doi:10.1039/b919413d), 2009-11-27
Supplement: b919413d.pdf [file b919413d.pdf]

# Supporting Information

## Catalytic S<sub>N</sub>Ar reaction of nonactivated fluoroarenes with amines via Ru $\eta^6$ -arene complexes

*Maiko Otsuka, Kohei Endo, and Takanori Shibata\**

*Department of Chemistry and Biochemistry, School of Advanced Science and Engineering,  
Waseda University, Okubo, Shinjuku, Tokyo, 169-8555, Japan  
E-mail: tshibata@waseda.jp*

### List of Contents

|                                                                    |        |
|--------------------------------------------------------------------|--------|
| General .....                                                      | S2     |
| Experimental Procedure .....                                       | S2     |
| Compound Data of the Products .....                                | S2-S3  |
| Screening of the Amounts of <i>p</i> -Fluorotoluene .....          | S3     |
| ESI-MS and <sup>31</sup> P NMR Analyses of the Intermediates ..... | S4-S17 |
| References .....                                                   | S18    |

## General

Anhydrous dioxane and tetrahydrofuran (THF) were purchased and dried over activated molecular sieves 4A. All reactions were carried out under an atmosphere of argon in oven-dried glassware with a magnetic stirring bar. Ru(cod)(methylallyl)<sub>2</sub>, fluoroarenes, amines, ligands, and trifluoroacetic acid were also commercially available and were used without further purification.

IR spectra were recorded with a JASCO FT210 spectrometer. <sup>1</sup>H and <sup>13</sup>C NMR spectra were recorded with a JEOL AL-400 spectrometer at 400 MHz and 100 MHz respectively using CDCl<sub>3</sub> as a solvent. <sup>31</sup>P NMR spectra were recorded with a Lambda-500 (202 MHz) spectrometer using THF-*d*<sub>8</sub> as a solvent. Chemical shift values for protons and carbons are reported in parts per million (ppm, δ scale) downfield from tetramethylsilane and are referenced to residual proton and carbon resources of CDCl<sub>3</sub> respectively (δ, 7.26 and 77.0). Chemical shifts for phosphorous are reported in parts per million (ppm, δ scale) referenced to H<sub>3</sub>PO<sub>4</sub>. ESI-MS spectra were measured with LCQ-DECA. High-resolution mass spectra (HRMS) were measured on a JEOL JMS-GCMateII with EI (Electron Ionization) method.

## Experimental Procedure

### General Procedure for the Ru-Catalyzed S<sub>N</sub>Ar reaction of *p*-fluorotoluene with morpholine

#### (Table 1, entry 9).

Ru(cod)(2-methylallyl)<sub>2</sub> (6.4 mg, 0.020 mmol), 1,5-bis(diphenylphosphino)pentane (12.3 mg, 0.028 mmol), and TfOH (3.5 μL, 0.040 mmol) were suspended in 0.20 mL of dioxane in a Schlenk tube. To the reaction mixture, *p*-fluorotoluene (2.0 mmol), morpholine (0.40 mmol), triethylamine (0.40 mmol) and triethylsilane (0.40 mmol) were added. The solution was then stirred at reflux for 24 h. After 24 h, the solvent were evaporated. The crude products were purified by thin-layer chromatography (hexane/AcOEt = 10/1) to give analytically pure **1** (72%).

## Compound Data of the Products

### Known compounds:

*N*-(4-Methylphenyl)morpholine<sup>1</sup> (**1**), *N*-phenylmorpholine<sup>1</sup> (**2**), *N*-(3-methylphenyl)morpholine<sup>1</sup> (**3**),  
*N*-(4-methoxyphenyl)morpholine<sup>1</sup> (**5**), *N*-(3-methoxyphenyl)morpholine<sup>1</sup> (**6**),  
*N*-(2-methoxyphenyl)morpholine<sup>2</sup> (**7**), *N*-(4-(*N,N*'-dimethylamino)phenyl)morpholine<sup>3</sup> (**8**),  
*N*-(4-vinylphenyl)morpholine<sup>1</sup> (**9**), *N*-(4-methylphenyl)piperidine<sup>4</sup> (**10**),  
*N*-methyl-*N*'-(4-methylphenyl)piperazine<sup>5</sup> (**11**), *N*-(4-methylphenyl)pyrrolidine<sup>6</sup> (**12**),  
*N*-benzyl-*N*-methyl-4-methylaniline<sup>7</sup> (**14**), and *N*-cyclohexyl-4-methylaniline<sup>8</sup> (**15**)

<sup>1</sup>H and <sup>13</sup>C NMR spectra and MS spectra of these compounds were consistent with those in the literatures.

**New compounds:***N*-(3,4-Dimethylphenyl)morpholine (**4**)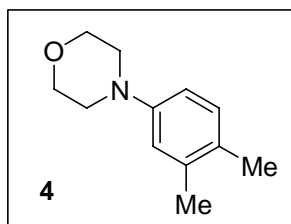

Colorless oil,  $^1\text{H NMR}$  ( $\text{CDCl}_3$ , 400 MHz)  $\delta$  2.19 (s, 3H), 2.24 (s, 3H), 3.10 (t,  $J = 4.8$  Hz, 4H), 3.85 (t,  $J = 4.8$  Hz, 4H), 6.67 (dd,  $J = 8.0, 2.0$  Hz, 1H), 6.73 (d,  $J = 2.0$  Hz, 1H), 7.03 (d,  $J = 8.0$  Hz, 1H);  $^{13}\text{C NMR}$  ( $\text{CDCl}_3$ , 100 MHz)  $\delta$  18.8, 20.2, 50.0, 67.0, 113.4, 117.7, 128.4, 130.2, 137.2, 149.6; IR (neat) 2962, 2854, 2817, 1614, 1506, 1450, 1242, 1122, 804  $\text{cm}^{-1}$ ; HRMS ( $\text{EI}^+$ ) Calcd. for:  $\text{C}_{12}\text{H}_{17}\text{NO}$   $[\text{M}]^+$  191.1310. Found:  $m/z$  191.1307.

*N*-Hexyl-*N*-methyl-4-methylaniline (**13**)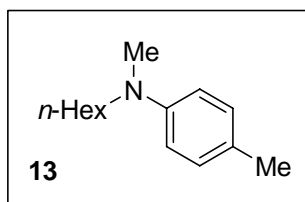

Colorless oil,  $^1\text{H NMR}$  ( $\text{CDCl}_3$ , 400 MHz)  $\delta$  0.88 (t,  $J = 7.2$  Hz, 3H), 1.28-1.31 (m, 6H), 1.50-1.57 (m, 2H), 2.23 (s, 3H), 2.87 (s, 3H), 3.24 (t,  $J = 8.0$  Hz, 2H), 6.62 (d,  $J = 8.8$  Hz, 2H), 7.02 (d,  $J = 8.8$  Hz, 2H);  $^{13}\text{C NMR}$  ( $\text{CDCl}_3$ , 100 MHz)  $\delta$  14.1, 20.2, 22.7, 26.5, 26.9, 31.8, 38.4, 53.2, 112.6, 125.1, 129.6, 147.5; IR (neat) 2927, 2858, 1620, 1522, 1367, 802  $\text{cm}^{-1}$ ; HRMS ( $\text{EI}^+$ ) Calcd. for:  $\text{C}_{14}\text{H}_{23}\text{N}$   $[\text{M}]^+$  205.1830. Found:  $m/z$  205.1818.

**Screening of the Amounts of *p*-Fluorotoluene**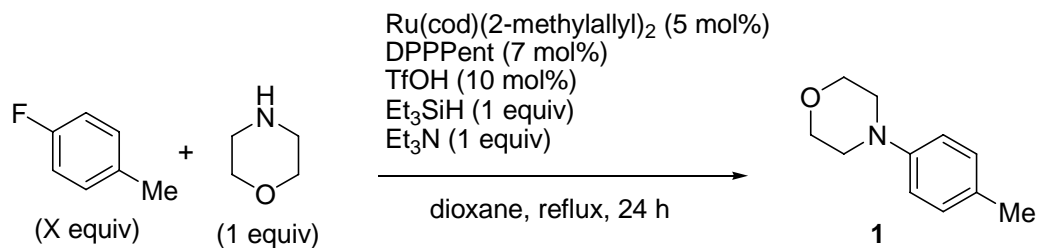

| Entry | X | Yield [%] |
|-------|---|-----------|
| 1     | 1 | 22        |
| 2     | 2 | 50        |
| 3     | 3 | 54        |
| 4     | 4 | 60        |
| 5     | 5 | 72        |

### ESI-MS and $^{31}\text{P}$ NMR Analyses of the Intermediates

We successfully observed the Ru  $\eta^6$ -arene complexes **17** and **18** as reaction intermediates by ESI-MS and  $^{31}\text{P}$  NMR analyses. As the result of the ESI-MS analyses, the observed isotope patterns of **17** and **18** were consistent with those of the theoretical isotope patterns respectively. Furthermore, both of the  $^{31}\text{P}$  NMR spectra of **17** and **18** almost accorded with the spectrum of the pincer-type Ru  $\eta^6$ -arene complex.<sup>9</sup> In those NMR analyses, all analytical samples were prepared under argon atmosphere, because these Ru complexes in the samples were air sensitive.

### $^1\text{H}$ NMR Analyses of the Intermediates **17** and **18**

$^1\text{H}$  NMR analyses of the Ru  $\eta^6$ -arene complexes **17** and **18** were also conducted, but we could not assign the  $^1\text{H}$  NMR spectra of **17** and **18**, probably because they were not major products in the reaction mixtures. Isolation and full characterization of complexes **17** and **18** could not be achieved yet and they were deferred to a future publication.

### $[\text{Ru}(\text{dpppnt})(\eta^6\text{-fluorobenzene-}d_5)]^+ \text{OTf}^-$ (**17**)

#### ESI-MS Chart of **17**

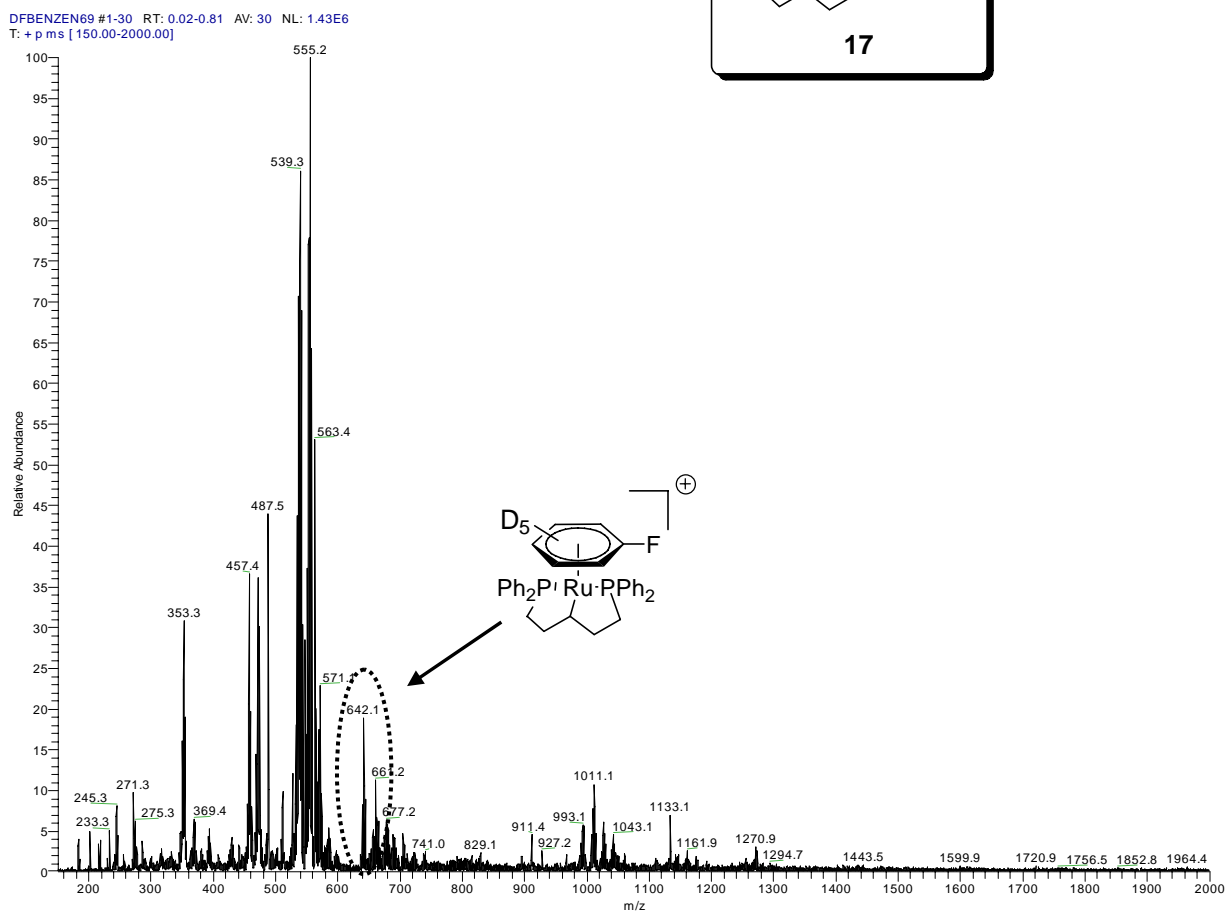

**Observed Isotope Pattern of  $C_{35}H_{29}D_5FP_2Ru$ :  $[Ru(dpppent)(\eta^6\text{-fluorobenzene-}d_5)]^+$** DFBENZEN69 #1-30 RT: 0.02-0.81 AV: 30 NL: 2.70E5  
T: +p ms [150.00-2000.00]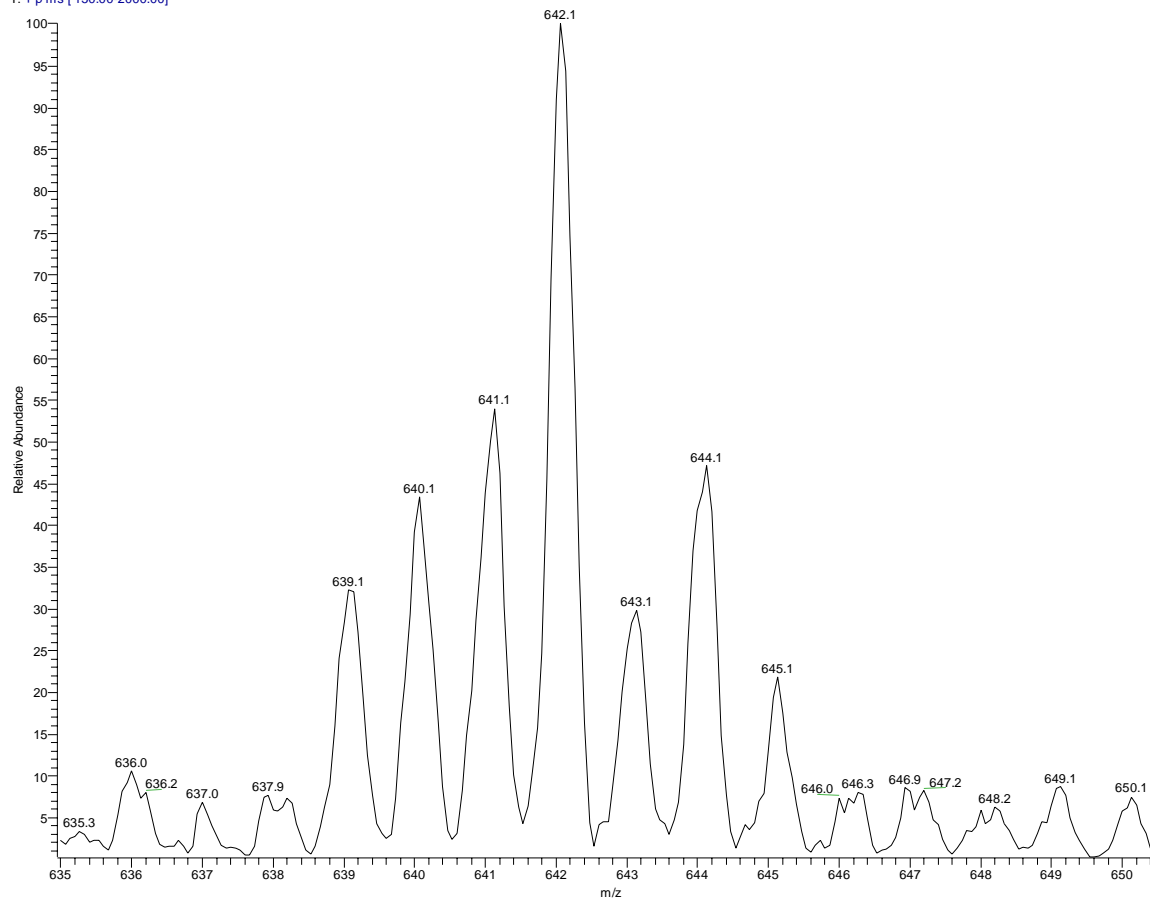**Theoretical Isotope Pattern of  $C_{35}H_{29}D_5FP_2Ru$ :  $Ru(dpppent)(\eta^6\text{-fluorobenzene-}d_5)]^+$** 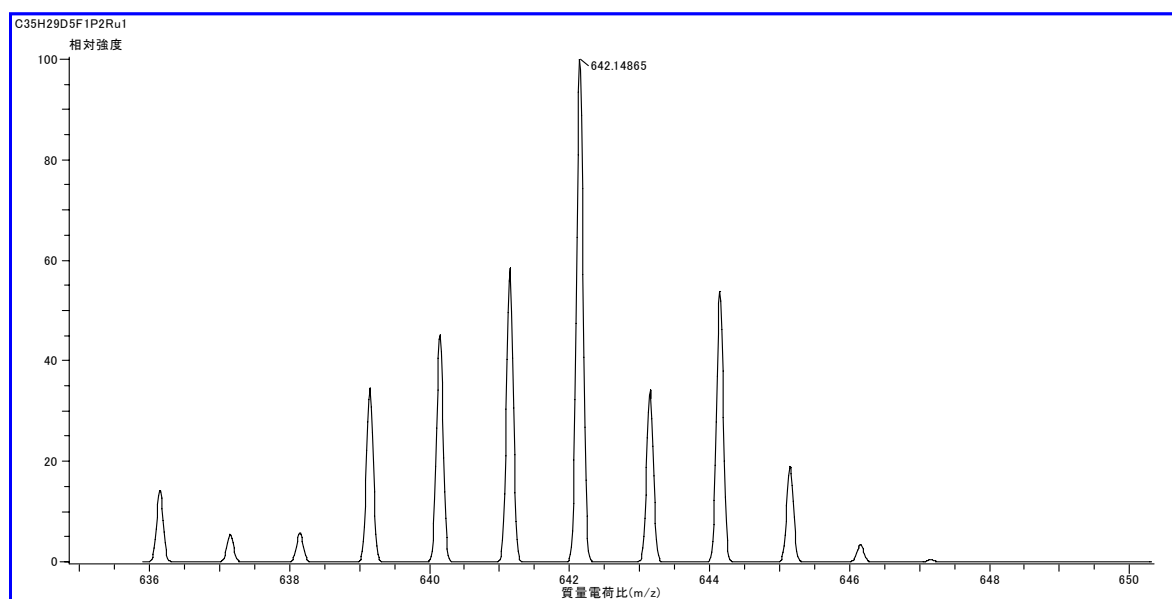

**$^{31}\text{P}$  NMR Spectrum of 17**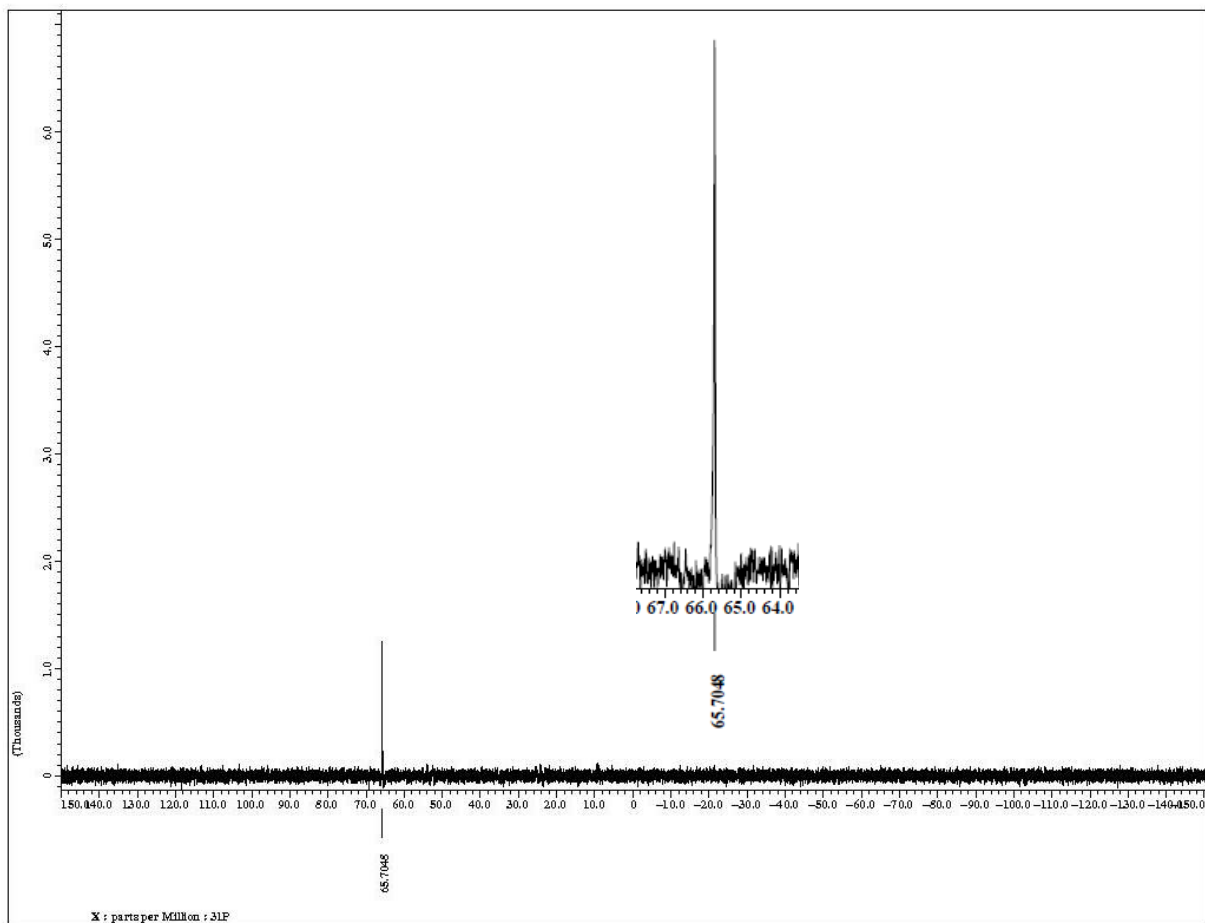

**$[\text{Ru}(\text{dpppent})(\eta^6\text{-morpholinobenzene-}d_5)]^+ \text{OTf}^-$  (18)****ESI-MS Chart of 18**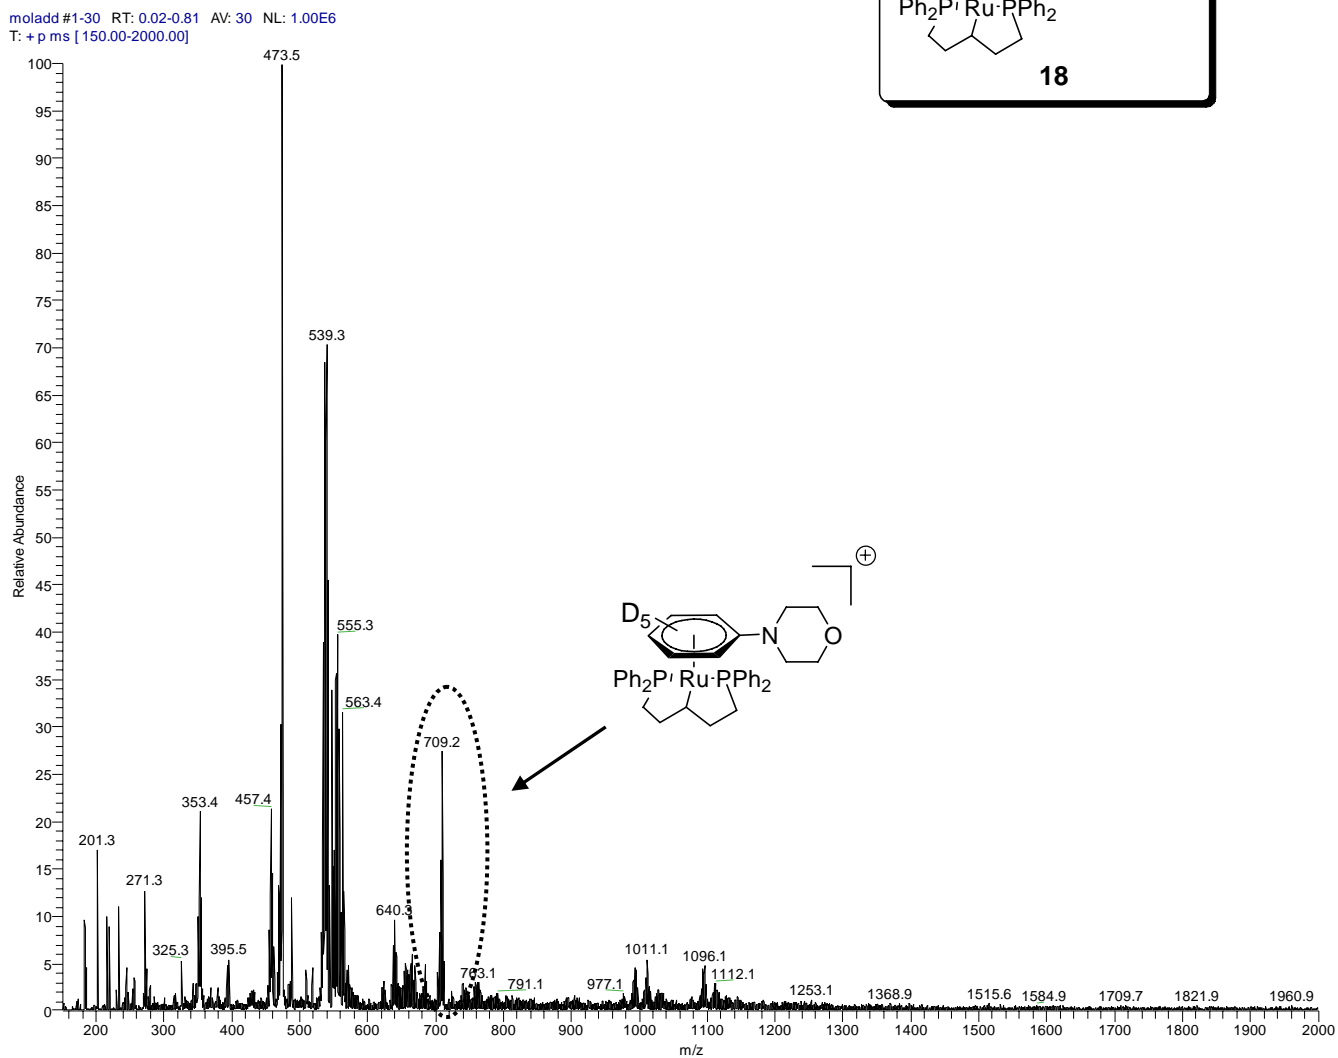

**Observed Isotope Pattern of  $C_{39}H_{37}D_5NOP_2Ru$ :  $[Ru(dpppent)(\eta^6\text{-morpholinobenzene-}d_5)]^+$** 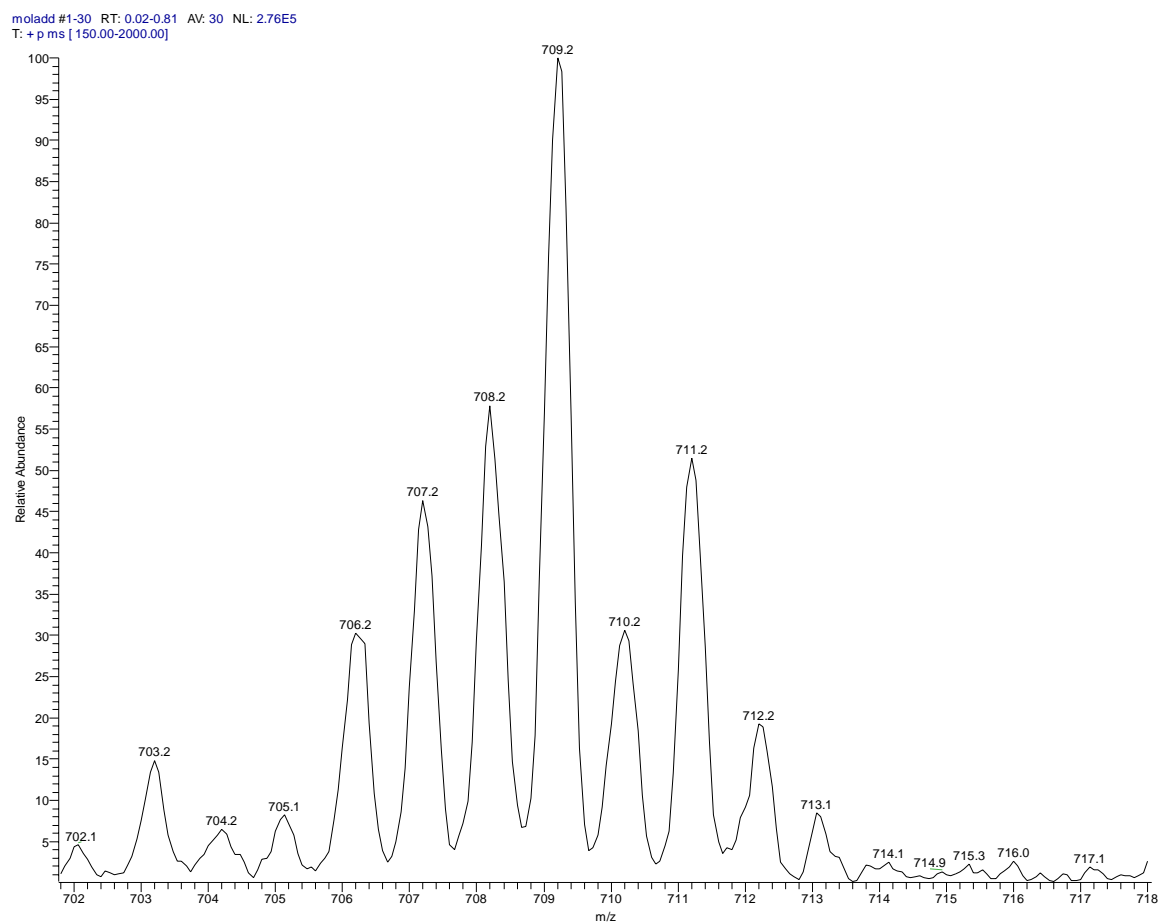**Theoretical Isotope Pattern of  $C_{39}H_{37}D_5NOP_2Ru$ :  $Ru(dpppent)(\eta^6\text{-morpholinobenzene-}d_5)]^+$** 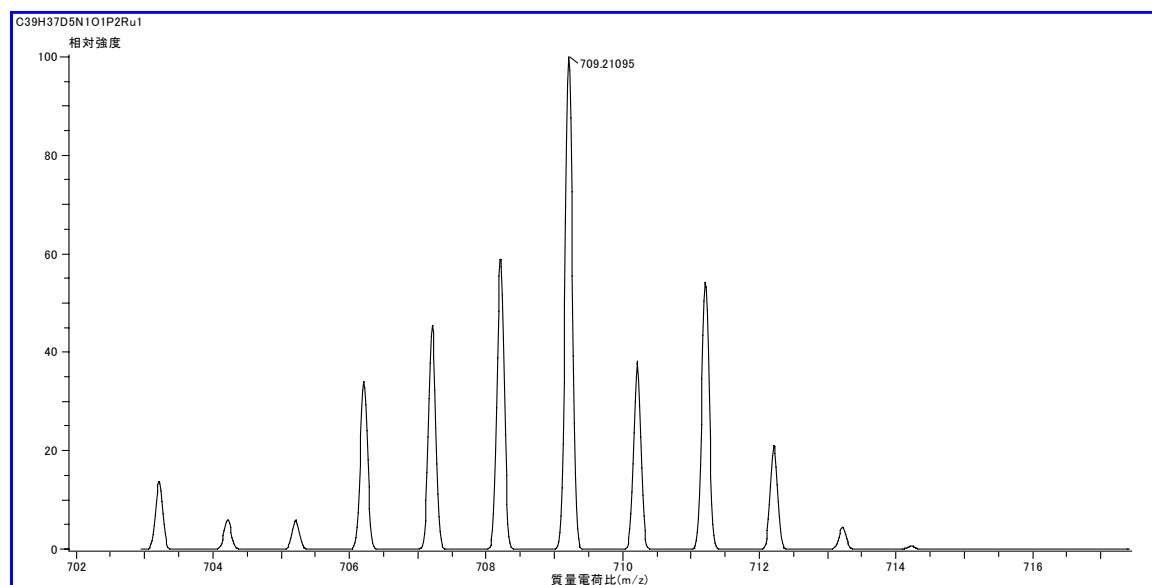



**$^{31}\text{P}$  NMR Spectrum of 18**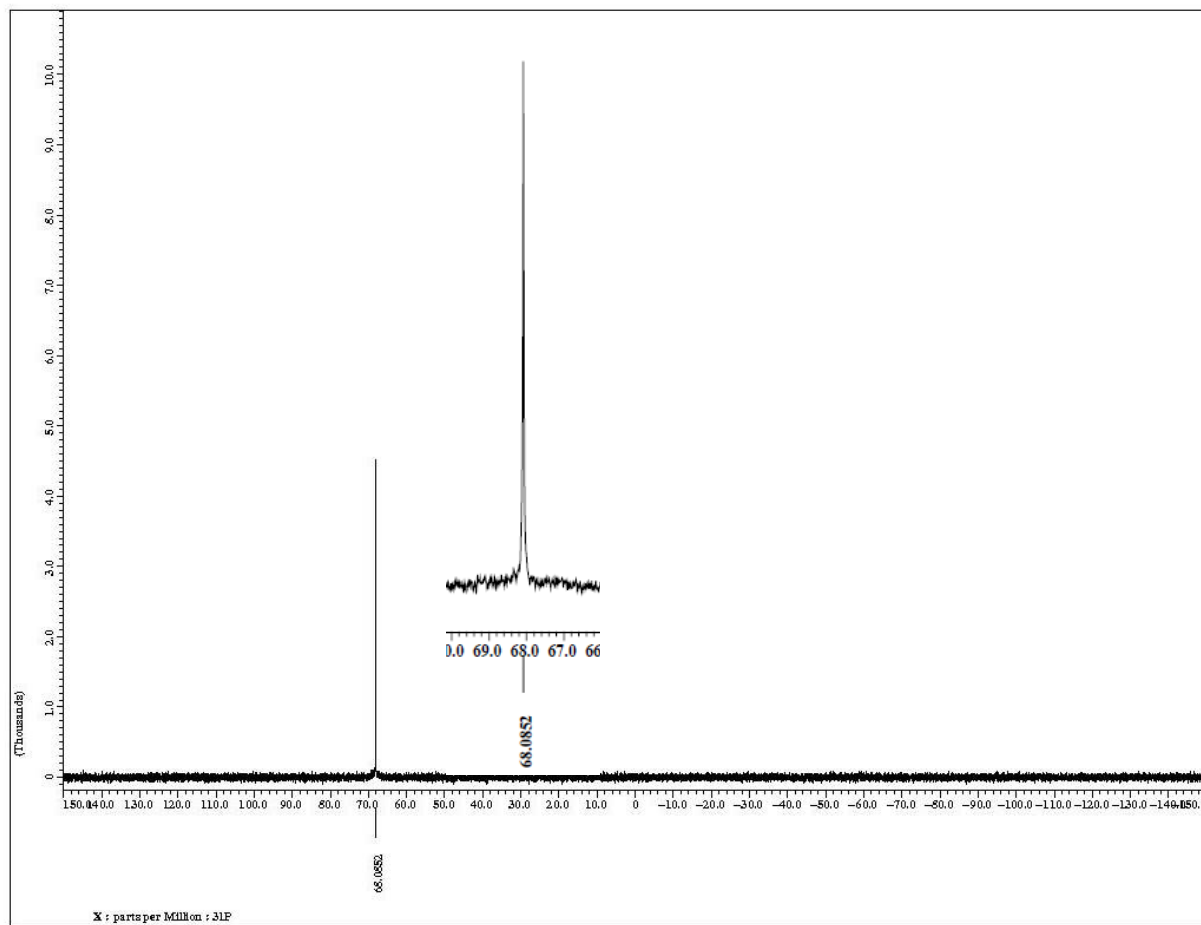

**The Change of Chemical Shift of  $^{31}\text{P}$  NMR; from 17 to 18**

We successfully observed that the peak of 17 shifted to the peak of 18 according to the addition of morpholine; monitored by  $^{31}\text{P}$  NMR analysis.

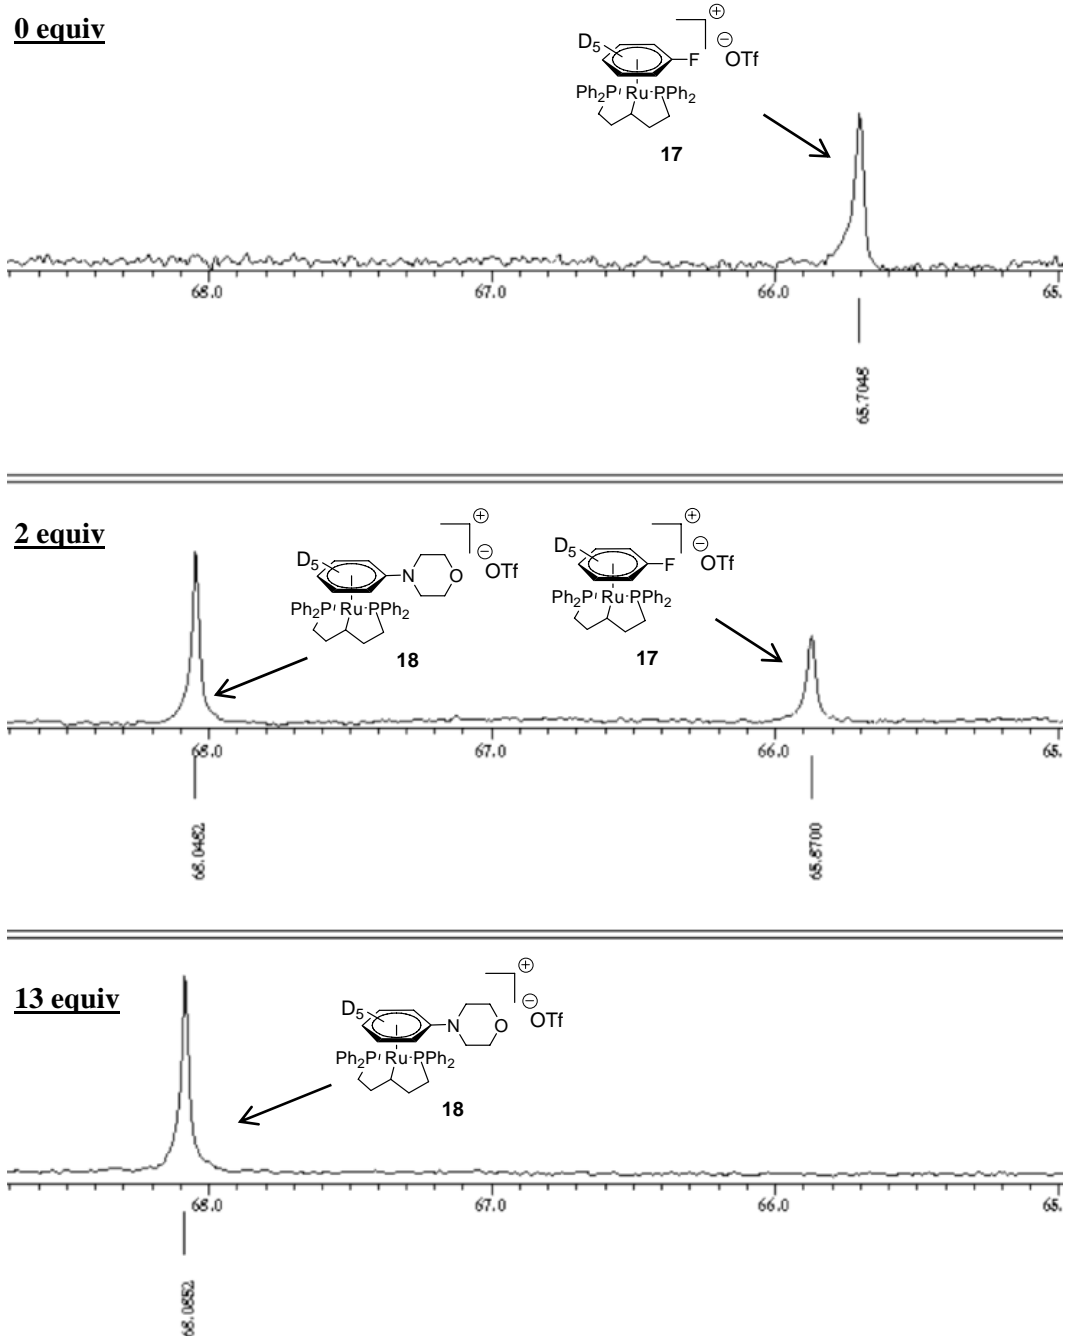

We also achieved the detection of the Ru  $\eta^6$ -arene complexes **19**, **20**, and **21** by ESI-MS analysis. The observed isotope patterns of **19**, **20**, and **21** were consistent with those of the theoretical isotope patterns respectively. Furthermore, the  $^{31}\text{P}$  NMR spectrum of **21** almost accorded with the spectrum of the pincer-type Ru  $\eta^6$ -arene complex.<sup>9</sup> In those NMR analysis, the analytical sample was prepared under argon atmosphere, because Ru complexes in the sample were air sensitive.

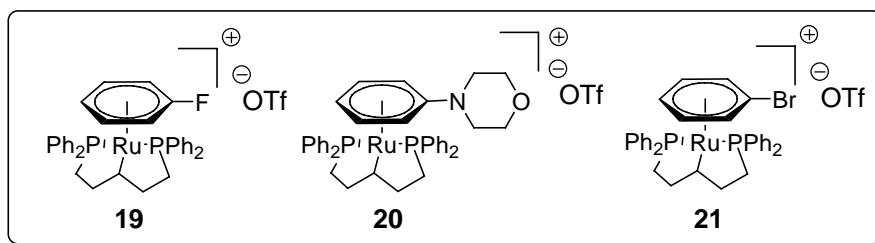

### [Ru(dppp)( $\eta^6$ -fluorobenzene)]<sup>+</sup> OTf<sup>-</sup> (**19**)

#### ESI-MS Chart of 19

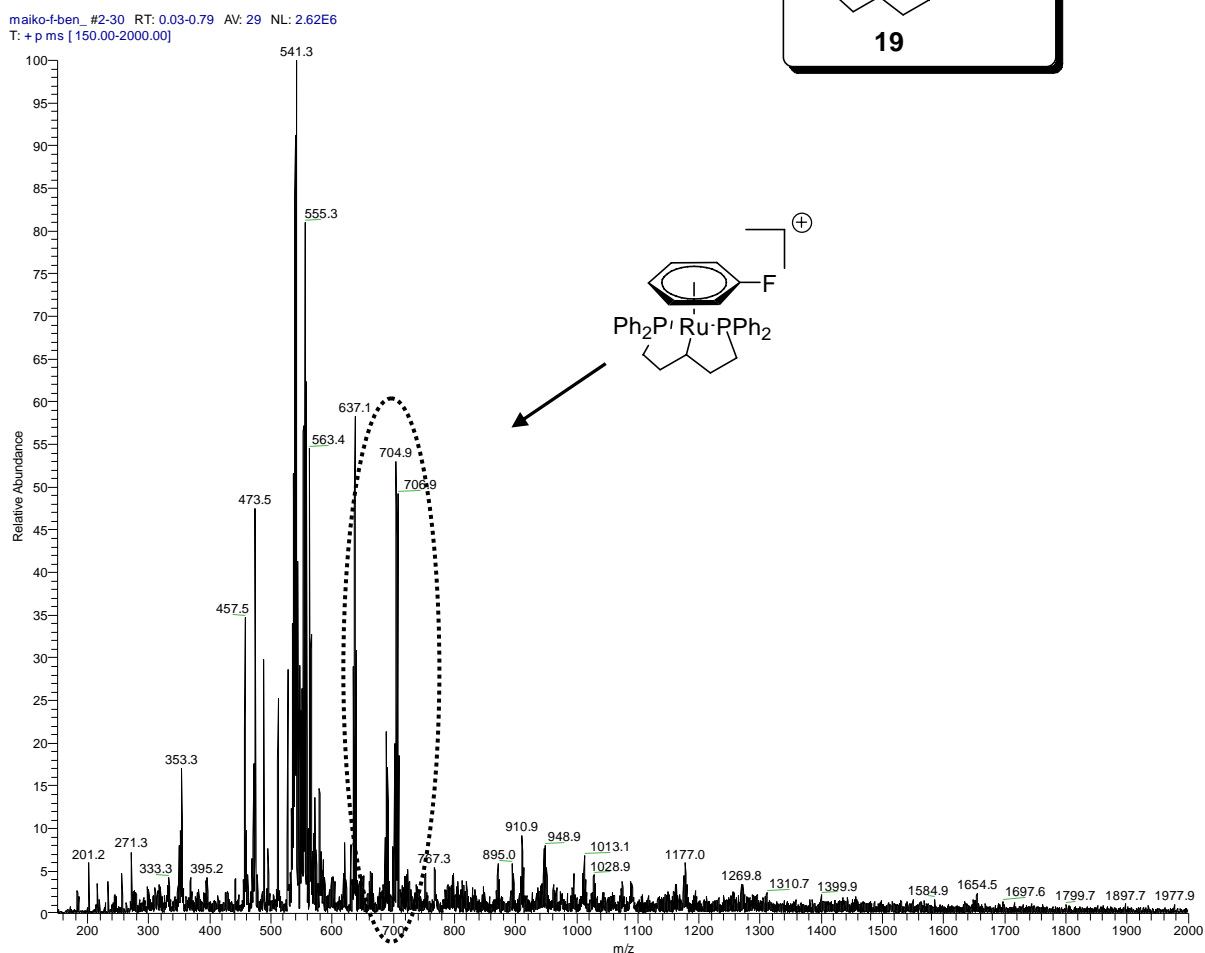

**Observed Isotope Pattern of C<sub>35</sub>H<sub>34</sub>FP<sub>2</sub>Ru: [Ru(dpppnt)( $\eta^6$ -fluorobenzene)]<sup>+</sup>**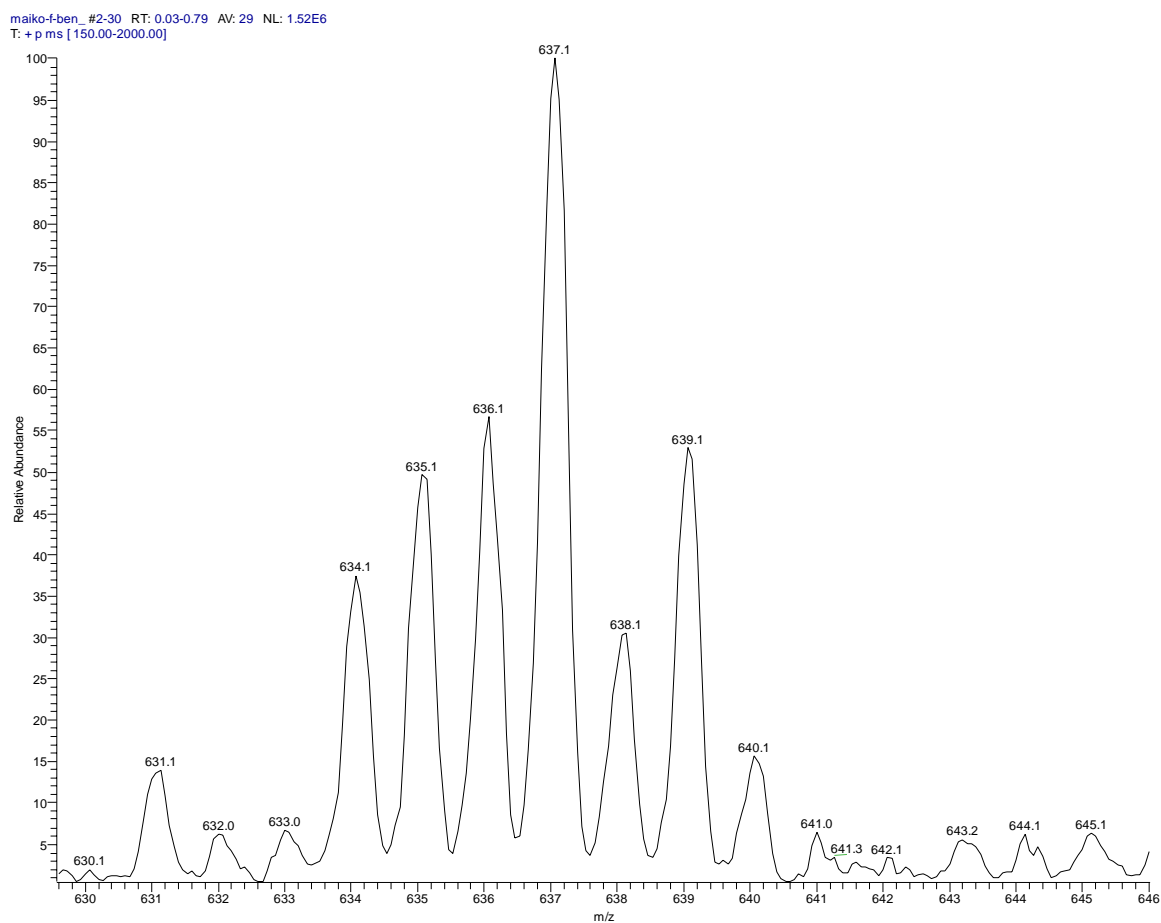**Theoretical Isotope Pattern of C<sub>35</sub>H<sub>34</sub>FP<sub>2</sub>Ru: [Ru(dpppnt)( $\eta^6$ -fluorobenzene)]<sup>+</sup>**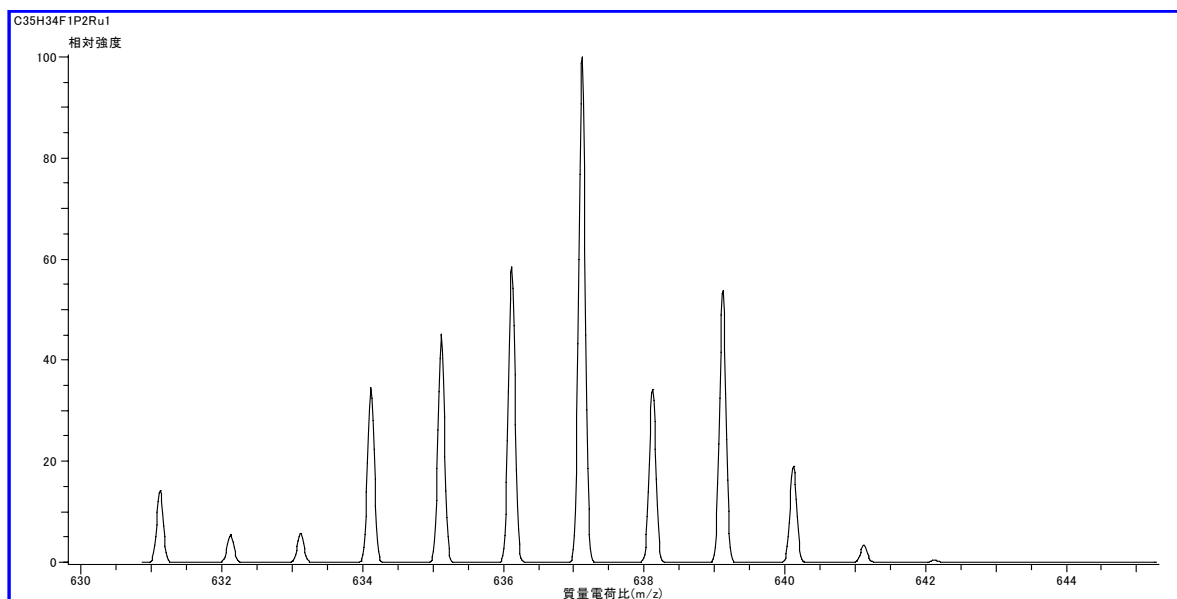

**[Ru(dpppent)( $\eta^6$ -morpholinobenzene)]<sup>+</sup> OTf<sup>-</sup> (20)****ESI-MS Chart of 20**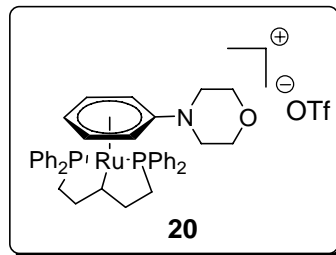626-mol #1-30 RT: 0.01-0.80 AV: 30 NL: 6.66E6  
T: + p ms [150.00-2000.00]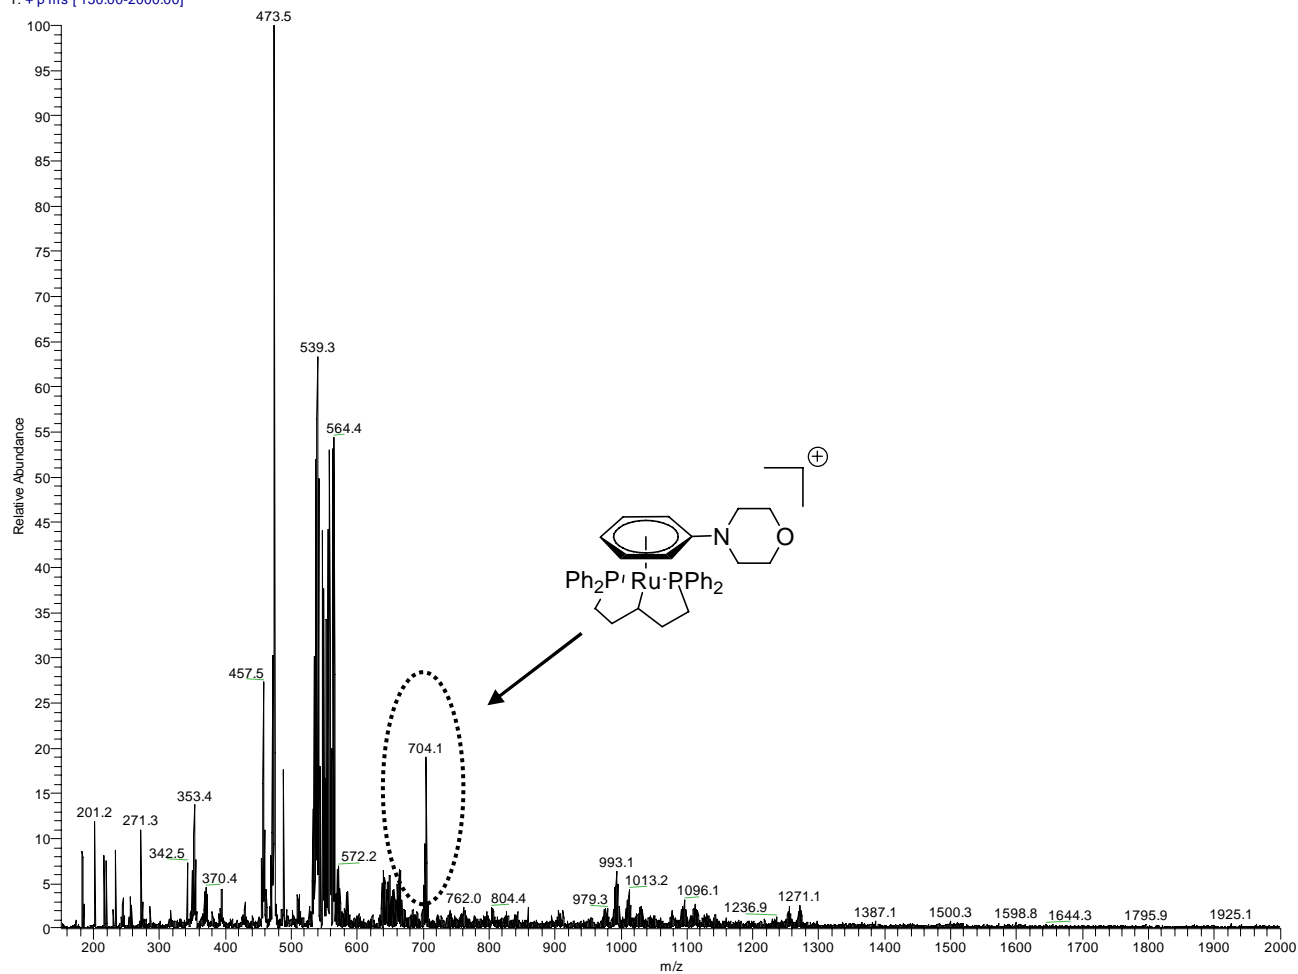

**Observed Isotope Pattern of  $C_{39}H_{42}NOP_2Ru$ :  $[Ru(dpppnt)(\eta^6\text{-morpholinobenzene})]^+$** 626-mol#1-30 RT: 0.01-0.80 AV: 30 NL: 1.26E6  
T: +p ms [150.00-2000.00]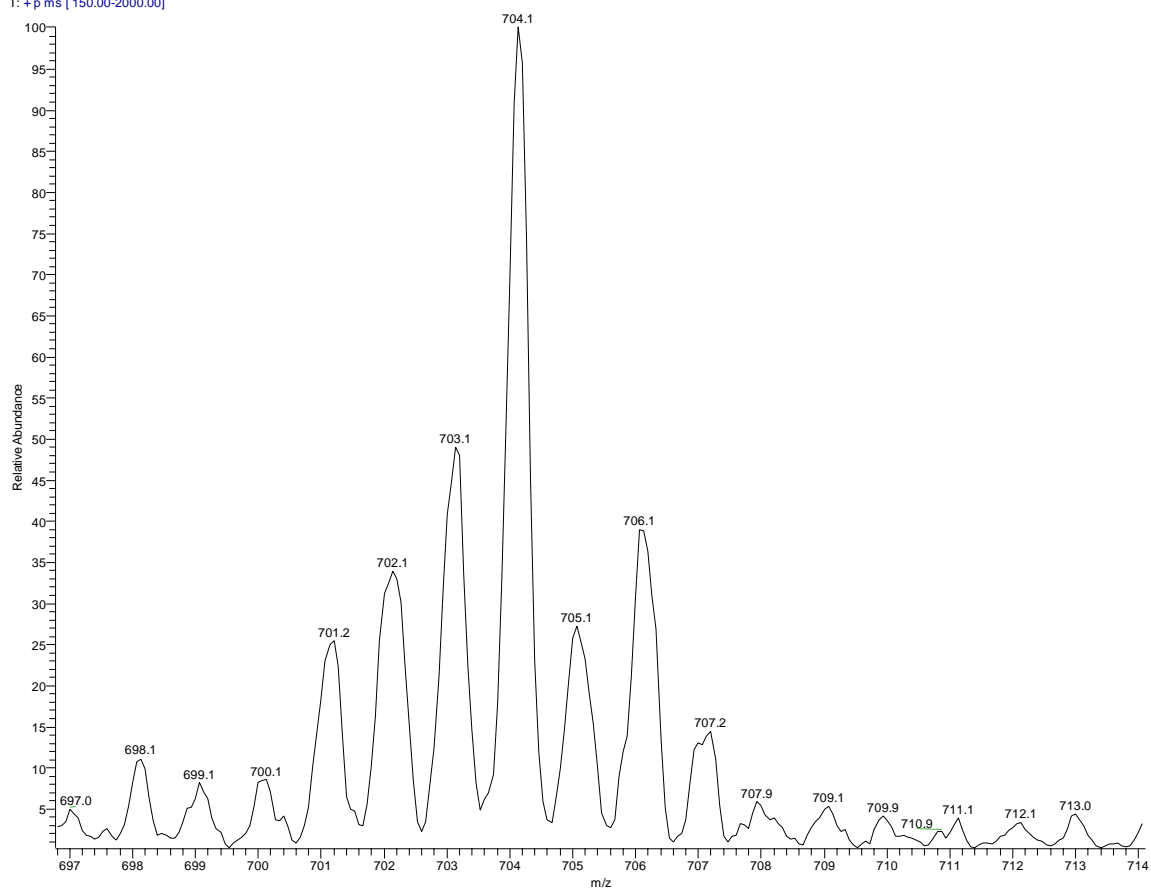**Theoretical Isotope Pattern of  $C_{39}H_{42}NOP_2Ru$ :  $[Ru(dpppnt)(\eta^6\text{-morpholinobenzene})]^+$** 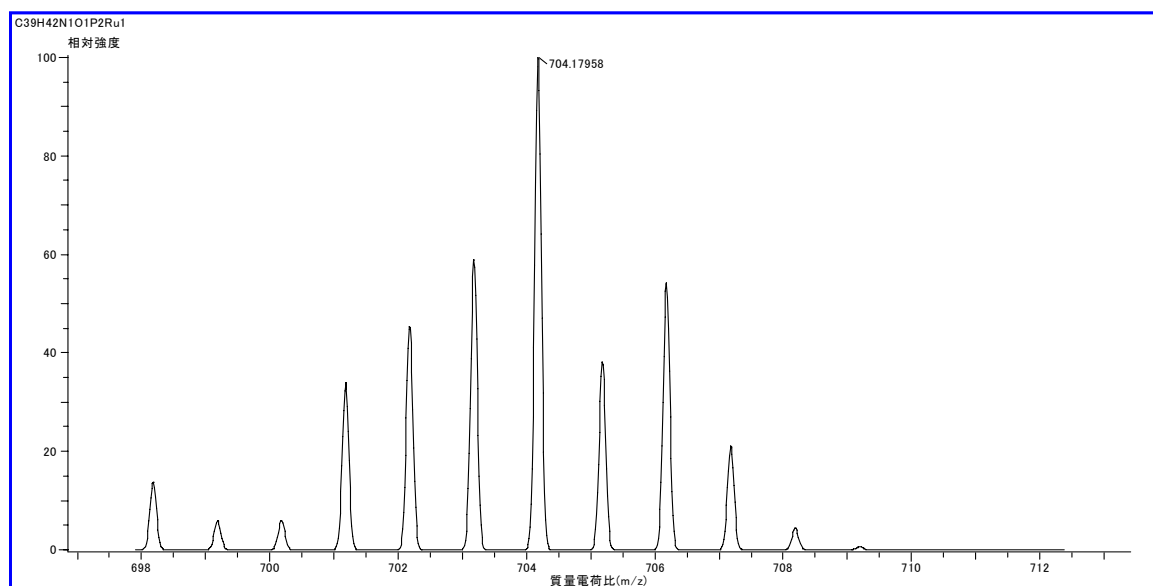

**[Ru(dpppent)( $\eta^6$ -bromobenzene)]<sup>+</sup> OTf<sup>-</sup> (**21**)**

To the Ru catalyst, an excess amount of bromobenzene was added in THF-*d*<sub>6</sub>. [Ru(dpppent)( $\eta^6$ -bromobenzene)]<sup>+</sup> OTf<sup>-</sup> (**21**) was detected by <sup>31</sup>P NMR in the reaction solution. Then an excess amount of morpholine was added to the solution and heated to 80 °C for 10 min. As a result, not [Ru(dpppent)( $\eta^6$ -morpholinobenzene)]<sup>+</sup> OTf<sup>-</sup> (**20**), but (**21**) was detected as a reaction intermediate. (the data of ESI-MS and <sup>31</sup>P NMR are shown below) This result strongly suggests that the catalytic reaction proceeds by S<sub>N</sub>Ar reaction.

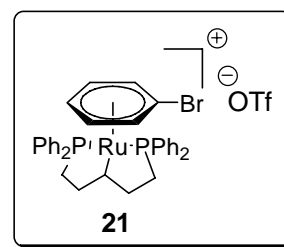**ESI-MS Chart of 21**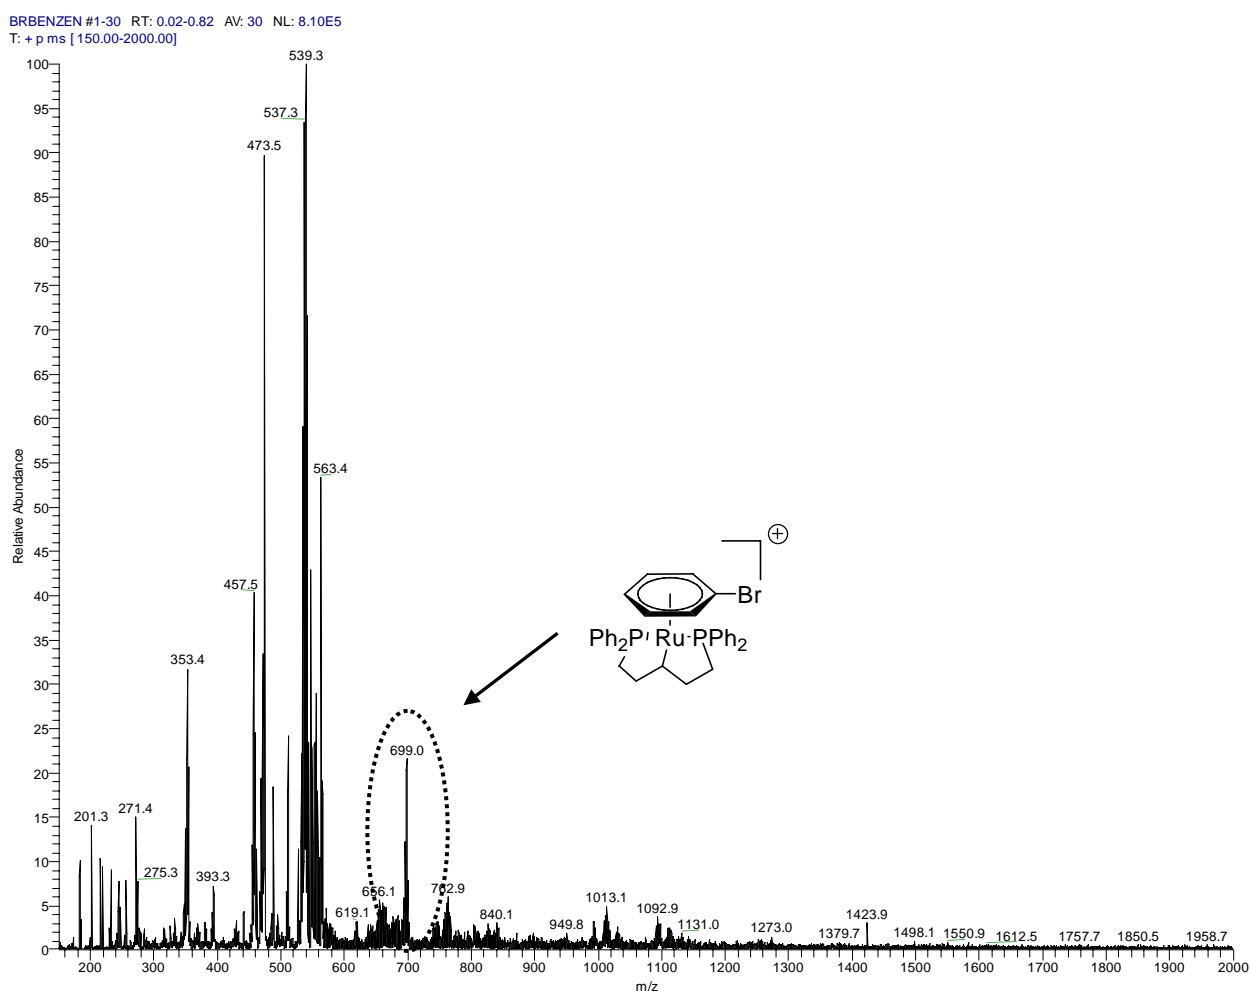

**Observed Isotope Pattern of C<sub>35</sub>H<sub>34</sub>BrP<sub>2</sub>Ru: [Ru(dpppent)( $\eta^6$ -bromobenzene)]<sup>+</sup>**BRBENZEN #1-30 RT: 0.02-0.82 AV: 30 NL: 1.75E5  
T: + p ms [150.00-2000.00]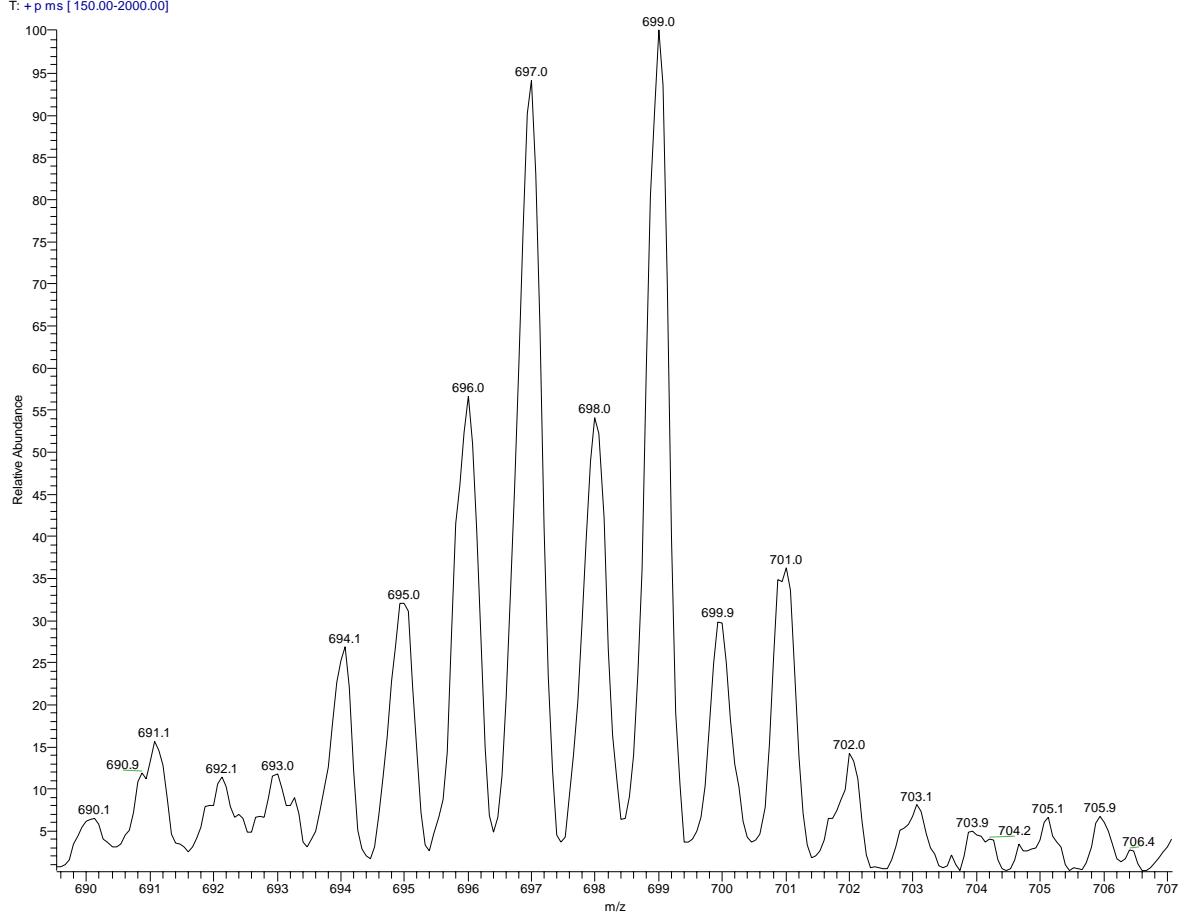**Theoretical Isotope Pattern of C<sub>35</sub>H<sub>34</sub>BrP<sub>2</sub>Ru: [Ru(dpppent)( $\eta^6$ -bromobenzene)]<sup>+</sup>**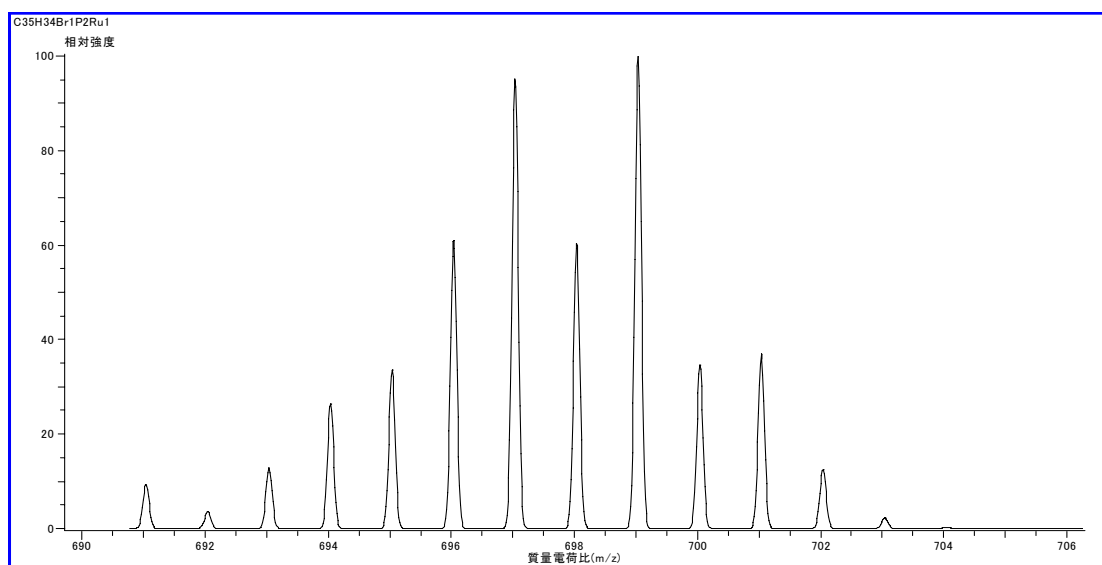



**$^{31}\text{P}$  NMR Spectrum of 21**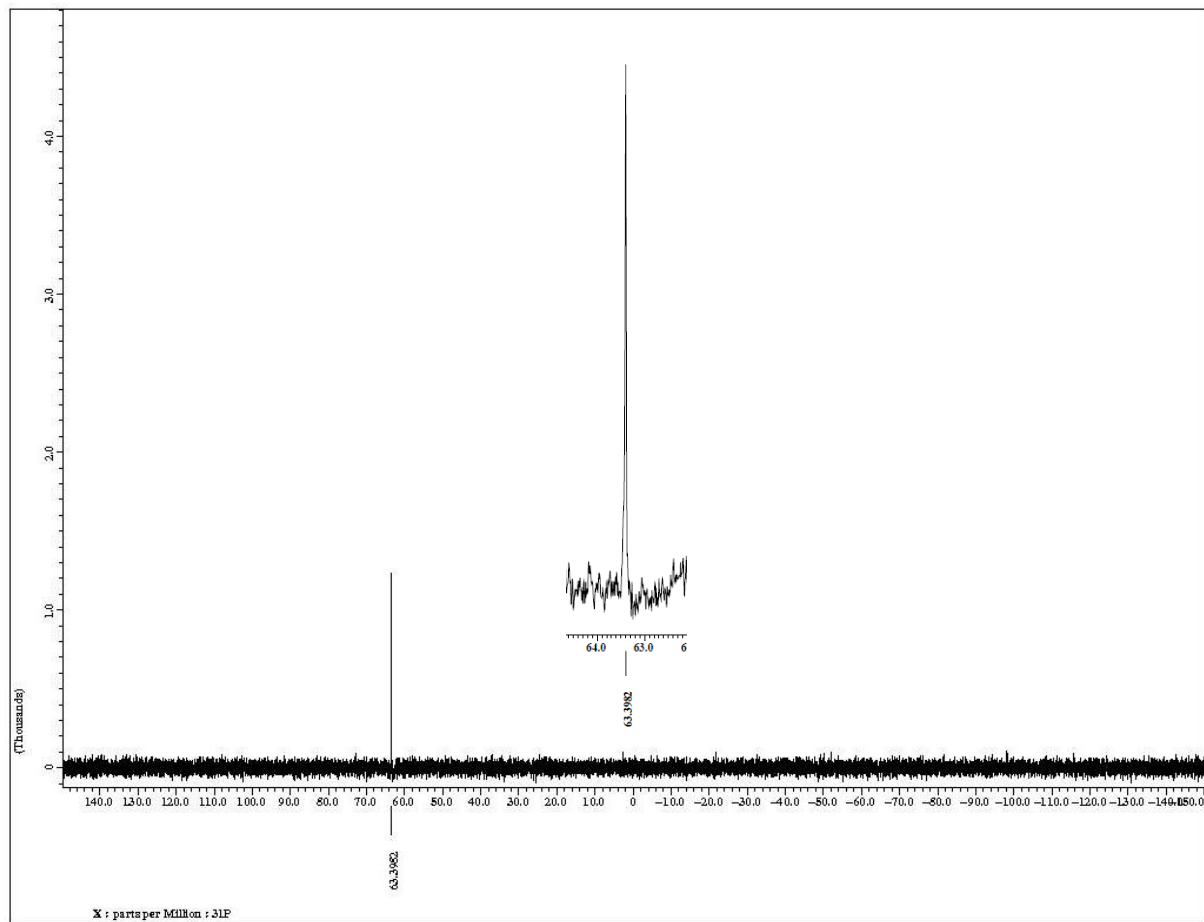

**References**

1. C. Desmarets, R. Schneider, Y. Fort, *J. Org. Chem.* **2002**, *67*, 3029.
2. M. H. Ali, S. L. Buchwald, *J. Org. Chem.* **2001**, *66*, 2560.
3. L. L. Hill, L. R. Moore, R. Huang, R. Craciun, A. J. Vincent, D. A. Dixon, J. Chou, C. J. Woltermann, K. H. Shaughnessy, *J. Org. Chem.* **2006**, *71*, 5117.
4. B. C. Hamann, J. F. Hartwig, *J. Am. Chem. Soc.* **1998**, *120*, 7369.
5. Q. Dai, W. Gao, D. Liu, L. M. Kapes, X. Zhang, *J. Org. Chem.* **2006**, *71*, 3928.
6. J. P. Wolfe, S. L. Buchwald, *J. Am. Chem. Soc.* **1997**, *119*, 6054.
7. J. P. Wolfe, S. L. Buchwald, *J. Org. Chem.* **1996**, *61*, 1133.
8. W. R. Bowman, P. T. Stephenson, N. K. Terrett, A. R. Young, *Tetrahedron* **1995**, 7959.
9. J. Takaya, J. F. Hartwig, *J. Am. Chem. Soc.* **2005**, *127*, 5756.
